# Supplementary material
Source: PubMed Central journal article supplement (PMC6448061)
Supplement: ajcr0009-0608-f5.pdf [file ajcr0009-0608-f5.pdf]

HS10160/HS10241 synergism in breast and ovarian cancer

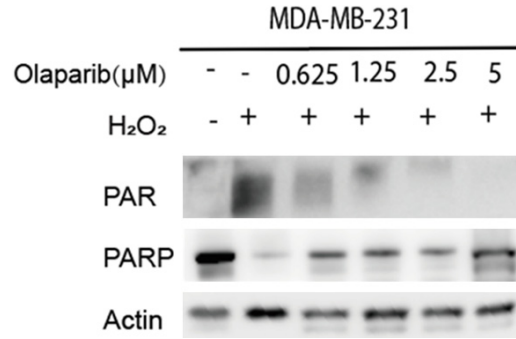

**Figure S1.** H<sub>2</sub>O<sub>2</sub>-induced PARylation is inhibited by olaparib. MDA-MB-231 cells were treated with olaparib at indicated concentration for overnight and subjected to 20 mM H<sub>2</sub>O<sub>2</sub> treatment for 20 min. Cells were then harvested for Western blotting analysis for detecting PARylation (PAR) and PARP1 expression. Actin were used as protein quantity loading control among different samples.

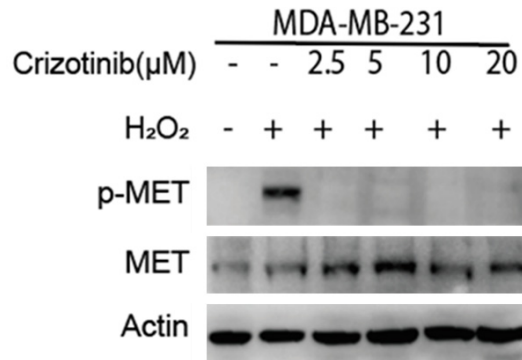

**Figure S2.** H<sub>2</sub>O<sub>2</sub>-induced MET activation is inhibited by crizotinib. MDA-MB-231 cells were treated with crizotinib at indicated concentration for 3 h before subjected to 20 min, 20 mM H<sub>2</sub>O<sub>2</sub> treatment. Cells were then harvested for Western blotting analysis for detecting p-Y1234/1235 MET (p-MET) and MET expression. Actin were used as protein quantity loading control among different samples.

HS10160/HS10241 synergism in breast and ovarian cancer

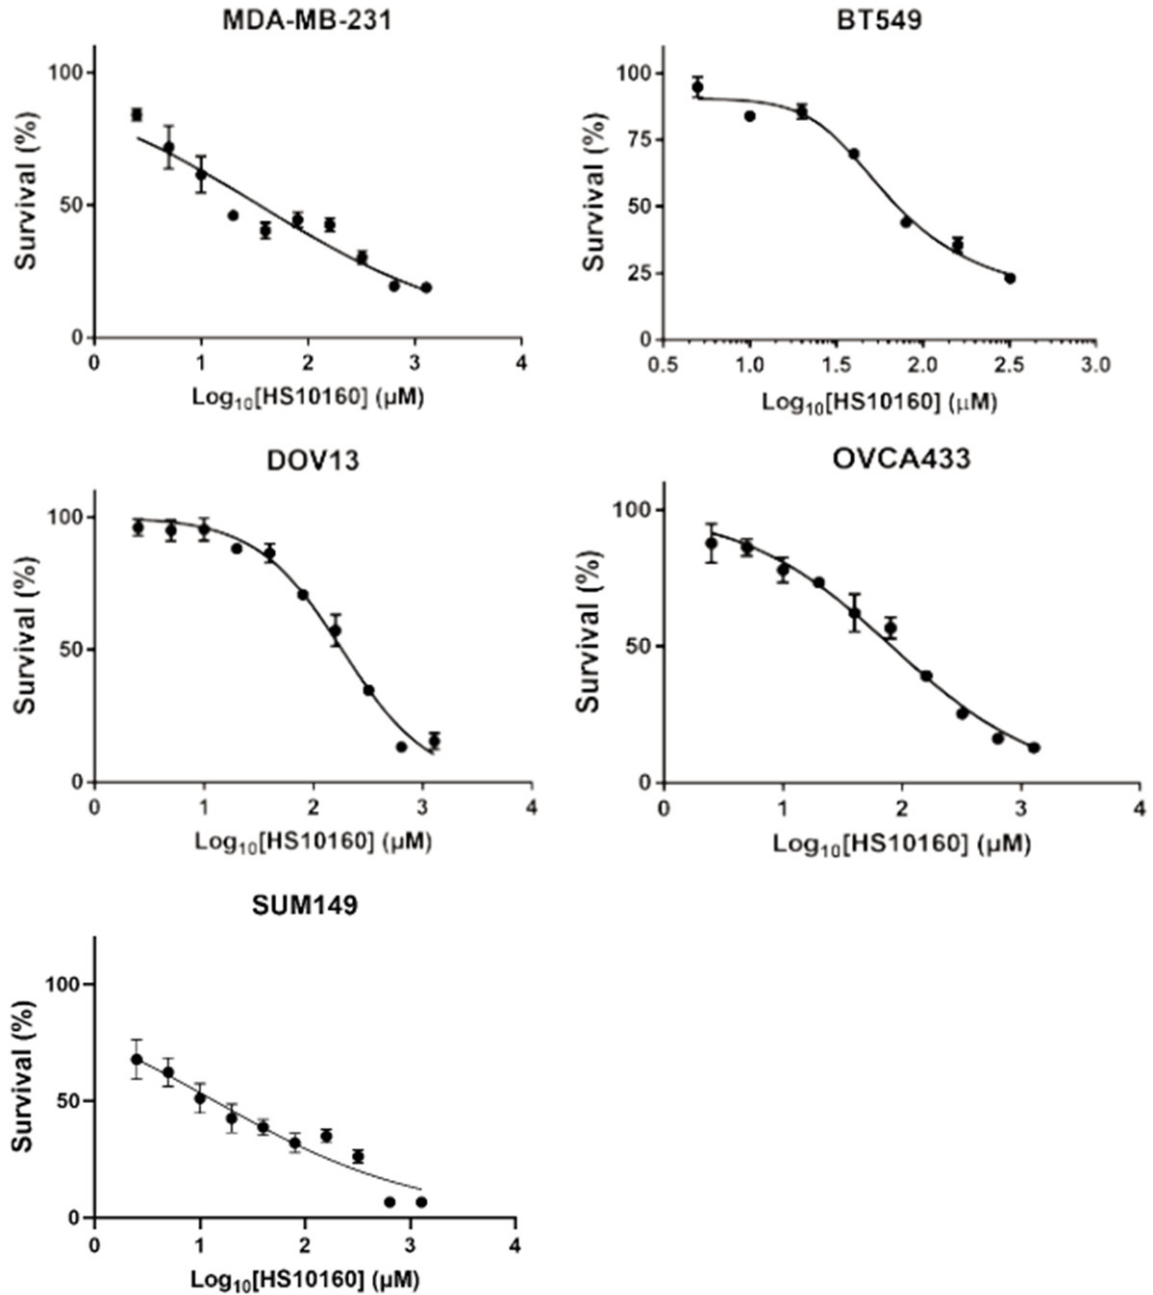

**Figure S3.** Cytotoxicity of HS-10160 in TNBC and HGSOc. Cells indicated were treated with different concentrations of HS10160 for 3 days before cell survival were measured by using MTT assays. Data from un-treated group were used as 100% survival to normalize survival rate in response to different HS-10160 concentrations. Mean  $\pm$  S.E.M. were plotted and interpolated curve is generated by using GraphPad Prism 8 with asymmetric sigmoidal curve.

## HS10160/HS10241 synergism in breast and ovarian cancer

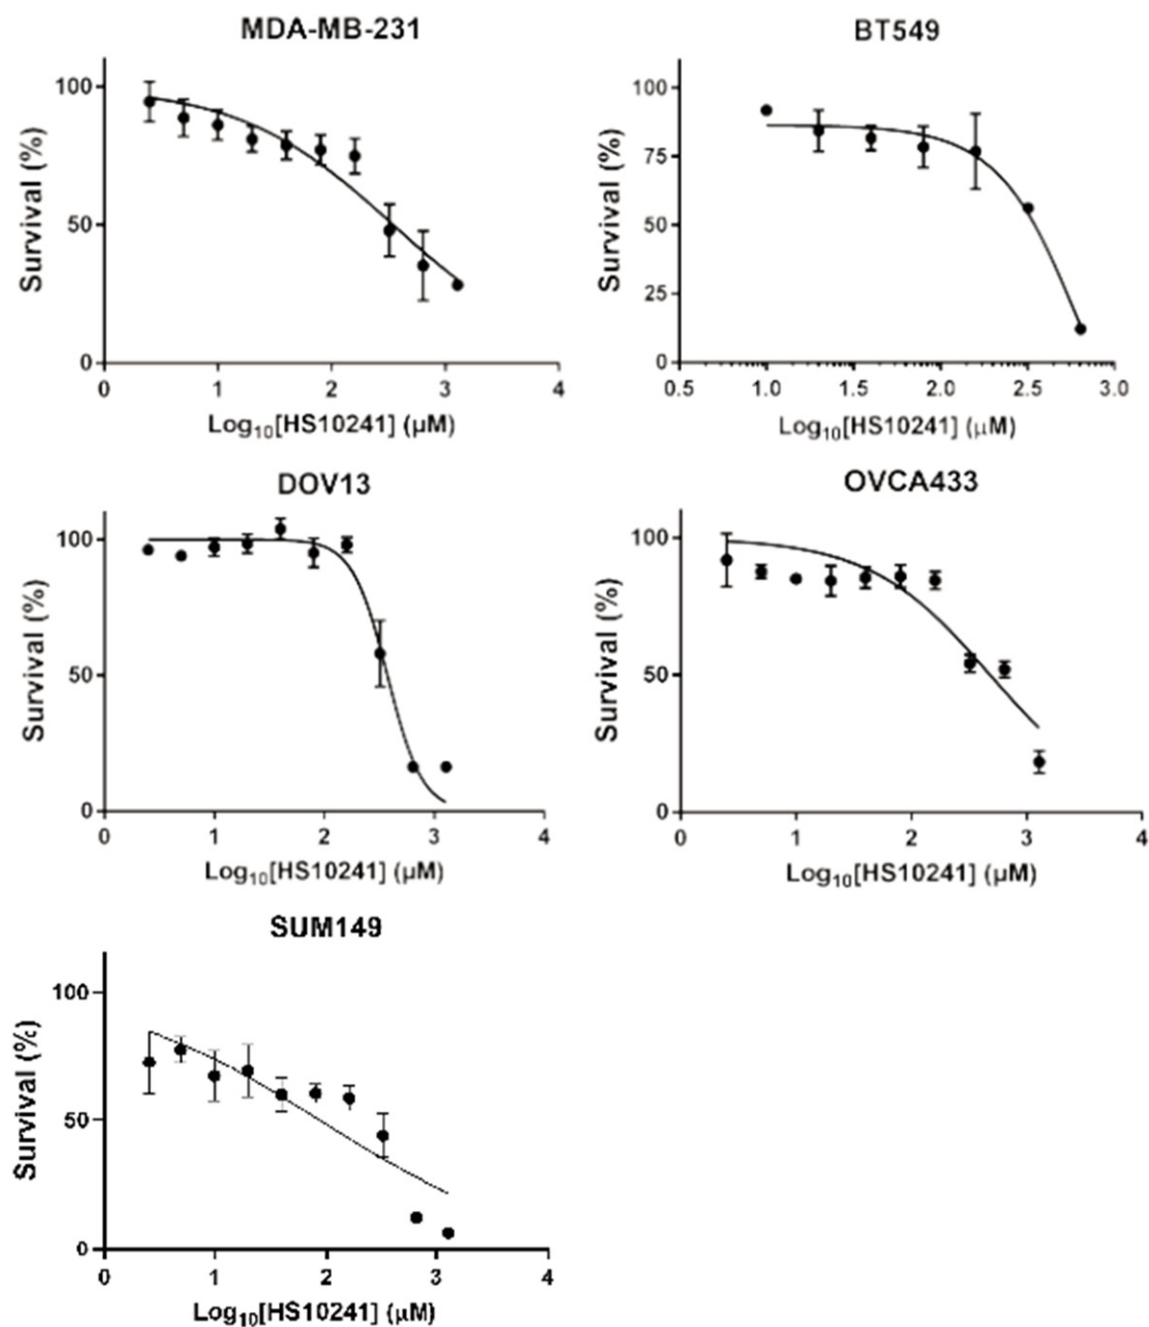

**Figure S4.** Cytotoxicity of HS-10241 in TNBC and HGSOC. Cells indicated were treated with different concentrations of HS10241 for 3 days before cell survival were measured by using MTT assays. Data from un-treated group were used as 100% survival to normalize survival rate in response to different HS-10160 concentrations. Mean  $\pm$  S.E.M. were plotted and interpolated curve is generated by using GraphPad Prism 8 with asymmetric sigmoidal curve.
